1 **MULTILEVEL SELECTION IN GROUPS OF GROUPS**

2 Jonathan N. Pruitt<sup>1,2\*</sup>, David N. Fisher<sup>1</sup>, Raul Costa-Pereira<sup>1</sup>, Noa Pinter-Wollman<sup>3</sup>

3

4 <sup>1</sup>Department of Psychology Neuroscience & Behaviour, McMaster University, Hamilton,

5 Ontario L8S 4K1, Canada

6 <sup>2</sup>Marine Science Institute, University of California Santa Barbara, Santa Barbara, CA, 93106

7 USA

8 <sup>3</sup>Department of Ecology & Evolutionary Biology, University of California Los Angeles, Los

9 Angeles, CA 90095 USA

10 **\*Denotes corresponding author**

11  
12  
13  
14  
15  
16  
17  
18  
19  
20  
21  
22  
23  
24  
25

## Abstract

Natural selection occurs at many levels. We evaluated selection acting on collectives at a level of multilevel selection analysis not yet quantified: within and between clusters of groups. We did so by monitoring the performance of natural colonies of social spiders with contrasting foraging aggressiveness in clusters of various sizes. Within-clusters, growth rates were suppressed when colonies were surrounded by more rival groups, conveying that competition is greater. When colonies were surrounded by few rivals, the more aggressive colonies in a cluster were more successful. In contrast, relatively non-aggressive colonies performed better when surrounded by many rivals. Patterns of selection between-clusters depended on the performance metric considered, but cluster-wide aggressiveness was always favored in small clusters. Together, selection both within- and between natural clusters of colonies was detectable, but highly contingent on the number of competing colonies.

**Keywords:** collective behavior, group selection, indirect genetic effects, multilevel selection, social selection

26 Natural selection is context-dependent. In social organisms, context-dependent selection in  
27 individual-level traits forms the basis of diverse and powerful evolutionary forces, like indirect  
28 genetic effects, social selection, frequency-dependent selection, and their intersections (1-5). We  
29 contend that the context-dependent nature of selection observed in individual traits could  
30 transcend to the level of the group and their collective behavior too. For instance, the collective  
31 traits that enable group success might depend on the presence and phenotypes of surrounding  
32 groups, resulting in cases where the phenotypic compositions of some clusters of groups  
33 outperform other clusters. Whether selection occurs above the level of the group is not often  
34 evaluated in the multilevel selection literature (6-9), and the idea is often viewed critically on  
35 conceptual grounds. Field data documenting such selection in intact free-living systems are  
36 particularly rare. However, if selection above the level of the group is present, then it has the  
37 potential to change the evolution of individual and collective traits across a variety of social  
38 organisms and communities, especially in systems where social groups interact with each other  
39 intensely.

40  
41 Here we evaluate how the number of neighboring rival groups changes two tiers of selection on  
42 collective behavior in a social spider (*Stegodyphus dumicola*). Specifically, we predict that the  
43 intensity of competition experienced by a focal group will scale positively with the number of  
44 rival groups nearby, which could alter selection both within and among clusters of colonies and  
45 potentially select against clustering (10). Prior work on *S. dumicola* showed that frequency-  
46 dependent selection can, at least in principle, act on among-group differences in collective  
47 behavior (11). In experimental clusters of colonies, the success of aggressive groups decreases as  
48 they become common within clusters. This is because aggressive colonies are more sensitive to

49 low resource conditions, and prey are scarcer in clusters dominated by aggressive colonies. We  
50 therefore predicted that i) increasing competition between colonies (i.e., increasing the number  
51 of rivals) will reduce the performance of aggressive colonies, and ii) the performance of  
52 aggressive clusters of colonies will decrease as the number of colonies in the cluster increases.

53

54 To examine the degree of selection on collective behavior within and among clusters of spider  
55 colonies, we monitored the foraging phenotypes and performance of colonies from March 2018  
56 to March 2019. Natural clusters of colonies (1-9 colonies, Fig. 1a) were identified along road  
57 side fences February-March 2018 in South Africa. We evaluated the collective foraging  
58 aggressiveness and colony size of each colony within each cluster. Foraging aggressiveness was  
59 evaluated thrice over two days in 2018 and 2019 by counting the number of individuals that  
60 responded to simulated prey item in the web. Starting colony sizes were estimated using the  
61 volume of the colony's nest (i.e., a disk-shaped cylinder), which is tightly associated with the  
62 number of spiders in the colony for fence-dwelling colonies ( $r^2 = 0.72-0.85$ , varying slightly  
63 among years). Variation in collective foraging aggressiveness is repeatable within and across  
64 generations in *S. dumicola*, and colony differences are transmitted from parent to daughter  
65 colonies during fission events, which create local clusters of related colonies upon which  
66 selection could act (12). This parent-offspring resemblance is itself retained across years (11).  
67 Thus, this system fulfills the rare pre-conditions necessary for a phenotypic response to selection  
68 both within and among clusters of colonies.

69

70 Colony success was determined at two time points. In June 2018, when colonies are dormant  
71 during the Austral winter, nests were removed from their substrate and dissected at hotels to

72 count the number of egg cases produced by the colony in 2018 (*egg case #*). Colonies were then  
73 re-adhered to their former positions using staples and aluminum wiring to supplement supporting  
74 structure. In March 2019, we destructively recollected colonies, dissected them open again, and  
75 counted the number of females within each nest. This allowed us to record the change in colony  
76 size from one generation to the next ( $\Delta$  *colony size*).

77

78 Colonies in larger clusters were less successful, and this was true for both change in colony size  
79 (*main effect* =  $-0.171 \pm 0.05$ ;  $p = 0.001$ ) and per capita egg cases (*main effect* =  $-0.116 \pm 0.06$ ;  $p$   
80 =  $0.05$ ). This finding confirms prior correlative and experimental findings that colonies of social  
81 spider compete (11, 13, 14), and conveys that larger clusters exacerbate competition for prey  
82 resources. Thus, selection should disfavor high levels of aggregation and promote greater  
83 dispersal, especially when clusters are composed of related colonies, which is not uncommon in  
84 *S. dumicola* (12).

85

86 Selection on within-cluster collective aggression was dependent on cluster size. In small clusters  
87 of colonies, higher aggressiveness relative to neighboring colonies was favored, whereas non-  
88 aggressive colonies were favored in large clusters. This was true both for colonies' proportional  
89 change in size (Fig. 1b; *interaction*:  $-0.336 \pm 0.06$ , LRT = 30.05,  $p < 0.001$ , *main effect*:  $0.171 \pm$   
90  $0.057$ ), and *per capita* egg case production (Fig. S1; *interaction*:  $-0.175 \pm 0.036$ , LRT = 25.33,  $p$   
91  $< 0.001$ , *main effect*:  $0.314 \pm 0.035$ ). Selection on aggressiveness is thus density-dependent,  
92 switching from positive in small clusters to negative in larger clusters, likely as a result of  
93 increased resource competition in large clusters because aggressive colonies are known to  
94 outcompete docile colonies if resources are plentiful (11). Density-dependent social or multilevel

95 selection has been observed in both plant and animal systems (15-18). However, the findings  
96 here are somewhat unique, first because the direction of selection is completely reversed in a  
97 density-dependent manner and not simply magnified, and second, because the density-  
98 dependence occurs at the level of the colony and their collective behavior rather than individual  
99 level traits.

100

101 We detected selection among clusters of colonies as well. Clusters of aggressive colonies grew  
102 proportionally more if the cluster was small, while this pattern was reversed in large clusters (Fig  
103 1c; *interaction*:  $-0.161 \pm 0.074$ , LRT = 4.655,  $p = 0.031$ , *main effect*:  $0.006 \pm 0.075$ ). For *per*  
104 *capita* egg cases production, however, more aggressive clusters were always more successful,  
105 regardless of cluster size (Fig. 1d; *interaction*:  $-0.045 \pm 0.095$ , LRT = 0.261,  $p = 0.61$ , *main*  
106 *effect* = 0.149,  $se = 0.056$ , LRT = 25.334,  $p < 0.001$ ). Thus, the advantage accumulated by large  
107 and aggressive clusters until egg case production is possibly offset by costs following the  
108 emergence of the next generation. Alternatively, the selective advantage of large aggressive  
109 clusters could continue across generations but be hidden by increased long-distance dispersal  
110 from these clusters, potentially linked to local prey resources (19). The long-distance dispersal  
111 abilities of this species prevent us from discriminating between these interpretations. However,  
112 the possibility for conflicting selection within vs. among clusters at large cluster sizes cannot be  
113 ignored for now: non-aggressive colonies produce more egg cases than their many neighbors, but  
114 large neighborhoods of aggressive colonies are still more fecund in aggregate (Fig. S1). What  
115 becomes of this cluster-level advantage is unclear.

116

117 Despite more than a half-century of scientific debate on the efficacy of selection above the level  
118 of the individual and dozens of papers detecting its presence, multilevel selection remains one of  
119 the most instantly controversial topics in evolutionary biology. Here we use multilevel  
120 selection analysis to evaluate selection within and across two levels of selection, both of which  
121 occurs above the level of the individual: i) groups and ii) groups (clusters) of groups. The *S.*  
122 *dumicola* system is suited for such an analysis because between-group differences in collective  
123 behavior are transmitted with fidelity down colony lines, and because the differences in colony  
124 aggressiveness cannot be linearly traced back down to the phenotypes of individual constituents.  
125 Collective behavior is instead determined by a highly non-additive process that depends on  
126 keystone individuals (20), social network structure (21), and a colony's social history (22). Yet,  
127 our data provide evidence that selection at the level of colonies and beyond are readily detectable  
128 in free-living colonies of this species, and that these levels of selection are potentially at odds for  
129 some cluster sizes. It therefore appears that evolutionary processes that emerge from feedback  
130 (positive or negative) between traits and the competitive environment are not restricted to  
131 individual levels traits, theoretical considerations, or contrived experimental settings. They are  
132 perhaps instead reasonably common and generalizable features of selection that scale from the  
133 level of genes to neighborhoods of competing societies, and conceivably beyond.

134

- 135 1. D. N. Fisher, A. G. McAdam, Social traits, social networks and evolutionary biology. *J. Evol. Biol.*  
136 **30**, 2088-2103 (2017).
- 137 2. A. J. Moore, E. D. Brodie, J. B. Wolf, Interacting phenotypes and the evolutionary process .1.  
138 Direct and indirect genetic effects of social interactions. *Evolution* **51**, 1352-1362 (1997).
- 139 3. O. T. Eldakar, M. J. Dlugos, J. W. Pepper, D. S. Wilson, Population structure mediates sexual  
140 conflict in water striders. *Science* **326**, 816-816 (2009).
- 141 4. O. T. Eldakar, D. S. Wilson, M. J. Dlugos, J. W. Pepper, The role of multilevel selection in the  
142 evolution of sexual conflict in the water strider *aquarius remigis*. *Evolution* **64**, 3183-3189  
143 (2010).
- 144 5. Z. Shaffer *et al.*, The foundress's dilemma: Group selection for cooperation among queens of the  
145 harvester ant, *pogonomyrmex californicus*. *Scientific Reports* **6**, (2016).

- 146 6. C. R. Johnson, M. C. Boerlijst, Selection at the level of the community: The importance of spatial  
147 structure. *Trends Ecol. Evol.* **17**, 83-90 (2002).
- 148 7. C. J. Goodnight, Experimental studies of community evolution .1. The response to selection at  
149 the community level. *Evolution* **44**, 1614-1624 (1990).
- 150 8. C. J. Goodnight, Experimental studies of community evolution .2. The ecological basis of the  
151 response to community selection. *Evolution* **44**, 1625-1636 (1990).
- 152 9. T. G. Whitham *et al.*, "All effects of a gene on the world": Extended phenotypes, feedbacks, and  
153 multi-level selection. *Ecoscience* **12**, 5-7 (2005).
- 154 10. C. R. Brown, M. B. Brown, E. A. Roche, V. A. O'Brien, C. E. Page, Fluctuating survival selection  
155 explains variation in avian group size. *Proc. Natl. Acad. Sci. U. S. A.* **113**, 5113-5118 (2016).
- 156 11. J. N. Pruitt, B. S. McEwen, S. T. Cassidy, G. A. Najm, N. Pinter-wollman, Experimental evidence of  
157 frequency-dependent selection on group behaviour. *Nature Ecology and Evolution*, (in press).
- 158 12. D. Smith, S. van Rijn, J. Henschel, T. Bilde, Y. Lubin, Amplified fragment length polymorphism  
159 fingerprints support limited gene flow among social spider populations. *Biol. J. Linn. Soc.* **97**,  
160 235-246 (2009).
- 161 13. J. Guevara, M. O. Gonzaga, J. Vasconcellos-Neto, L. Aviles, Sociality and resource use: Insights  
162 from a community of social spiders in brazil. *Behav. Ecol.* **22**, 630-638 (2011).
- 163 14. P. Fernandez-Fournier, J. Guevara, C. Hoffman, L. Aviles, Trait overdispersion and the role of  
164 sociality in the assembly of social spider communities across the americas. *Proc. Natl. Acad. Sci.*  
165 *U. S. A.* **115**, 6010-6015 (2018).
- 166 15. K. Donohue, Density-dependent multilevel selection in the great lakes sea rocket. *Ecology* **85**,  
167 180-191 (2004).
- 168 16. D. N. Fisher *et al.*, Multilevel and sex-specific selection on competitive traits in north american  
169 red squirrels. *Evolution* **71**, 1841-1854 (2017).
- 170 17. L. Stevens, C. J. Goodnight, S. Kalisz, Multilevel selection in natural-populations of *impatiens-*  
171 *capensis*. *Am. Nat.* **145**, 513-526 (1995).
- 172 18. C. Weing, J. A. Johnston, C. G. Willis, J. N. Maloof, Antagonistic multilevel selection on size and  
173 architecture in variable density settings. *Evolution* **61**, 58-67 (2007).
- 174 19. E. M. Jakob, Individual decisions and group dynamics: Why pholcid spiders join and leave groups.  
175 *Anim. Behav.* **68**, 9-20 (2004).
- 176 20. J. N. Pruitt *et al.*, The achilles' heel hypothesis: Misinformed keystone individuals impair  
177 collective learning and reduce group success. *Proc. R. Soc. B-Biol. Sci.* **283**, (2016).
- 178 21. E. R. Hunt *et al.*, Social interactions shape individual and collective personality in social spiders.  
179 *Proceedings of the Royal Society B: Biological Sciences* **285**, (2018).
- 180 22. J. N. Pruitt, N. Pinter-Wollman, The legacy effects of keystone individuals on collective behaviour  
181 scale to how long they remain within a group. *Proc. R. Soc. B-Biol. Sci.* **282**, 89-96 (2015).
- 182 23. U. Seibt, W. Wickler, Bionomics and social structure of 'family spiders' of the genus  
183 *stegodyphus*, with special reference to the african species s. *Dumicola* and s. *Mimosarum*  
184 (*araneidae*, *eresidae*). *Verh Naturwiss Ver Hamb* **30**, 255-303 (1988).
- 185 24. W. Wickler, U. Seibt, Pedogenetic sociogenesis via the sibling-route and some consequences for  
186 *stegodyphus* spiders. *Ethology* **95**, 1-18 (1993).
- 187 25. A. Kamath *et al.*, Collective behavior and colony persistence of social spiders depends on their  
188 physical environment. *Behav. Ecol.* **30**, 39-47 (2019).
- 189 26. M. Majer, C. Holm, Y. Lubin, T. Bilde, Cooperative foraging expands dietary niche but does not  
190 offset intra-group competition for resources in social spiders. *Scientific Reports* **8**, (2018).
- 191 27. J. N. Pruitt, L. Grinsted, V. Settepani, Linking levels of personality: Personalities of the 'average'  
192 and 'most extreme' group members predict colony-level personality. *Anim. Behav.* **86**, 391-399  
193 (2013).



- 194 28. C. J. Goodnight, J. M. Schwartz, L. Stevens, Contextual analysis of models of group selection, soft  
195 selection, hard selection, and the evolution of altruism. *Am. Nat.* **140**, 743-761 (1992).  
196 29. I. L. Heisler, J. Damuth, A method for analyzing selection in hierarchically structured populations.  
197 *Am. Nat.* **130**, 582-602 (1987).  
198 30. H. Schielzeth, Simple means to improve the interpretability of regression coefficients. *Methods*  
199 *in Ecology and Evolution* **1**, 103-113 (2010).  
200 31. R. D. C. Team. (R Foundation for Statistical Computing., Vienna, Austria, 2016).  
201 32. M. E. Brooks *et al.*, Glimmtmb balances speed and flexibility among packages for zero-inflated  
202 generalized linear mixed modeling. *R Journal* **9**, 378-400 (2017).

203

204 *Natural History*

205 Social *Stegodyphus* live in multifemale colonies that cooperate in alloparental care, web  
206 maintenance, and cooperative hunting (23, 24). Colonies are usually founded what one or a few  
207 pre-mated females disperse to found a new colony, which grows by the breeding of brothers to  
208 sisters for multiple generations. Only a small proportion of males move between colonies, which  
209 results in high levels of relatedness within groups, and variable levels of relatedness between  
210 neighboring groups (12, 23, 24).

211

212 *Cluster Identification*

213 We searched for colonies of *S. dumicola* positioned along fences (highways R74 and R714) by  
214 driving long stretches of highway. Clusters were defined as groups as nests that resided within  
215 1m of another nest, but where the majority of the capture web was not shared with other nests.  
216 We focused on fence-dwelling colonies because 1) colonies on fences outperform tree-dwelling  
217 colonies, 2) the largest and densest clusters reside on fences, and 3) fence-dwelling nests are  
218 two-dimensional (plate-shaped), which eases their dissection and reassembly (25). In March  
219 2019, we destructively recollected colonies, dissected them open again, and counted the number  
220 of females within each nest (*colony size*). Some focal clusters vanished entirely during the study  
221 from unknown causes. Only clusters that were tracked both years are considered here.

222

223 *Nest Volume & Group Size*

224 We used nest volume to estimate the starting colony sizes of the colonies in the present study.  
225 Nest volume was estimated using a cylinder formula, with the colony's radius and depth  
226 measured in situ using standard tape measurer or digital calipers, if the colony was small enough.

227 Using nest volume as a proxy for groups size is not uncommon in the social spider literature, and  
228 nest volume provides only a coarse approximation of colony size in social *Stegodyphus* when  
229 they do not reside on fences ( $r^2 = 0.35-0.69$ ) (26). Therefore, in March 2018 we estimated the  
230 volume of 37 fence-dwelling colonies and then counted the number of adult female spiders  
231 therein. We found that nest volume explained 83.5% of the variation in colony size in these  
232 colonies, and that ending nest volume explained 72% of the variation in our focal colonies here.  
233 Thus, nest volume provides a more precise estimate of colony size in fence-dwelling *S.*  
234 *dumicola*, presumably because fences are more homogeneous environments for colony creation  
235 and expansion.

236

### 237 *Collective Foraging Aggressiveness*

238 Colonies' foraging aggressiveness was estimated by the number of attackers deployed during a  
239 staged encounter with prey (after *II*, 27). Trials were initiated by placing a 1 cm x 1 cm square  
240 of computer paper in the capture web, and then vibrating the piece of paper for three minutes or  
241 until the spiders made contact with the paper and seized it. The paper was vibrated using a  
242 handheld vibratory device with a thin aluminum prod extending from one end. The vibrating  
243 prod was then placed gently against the paper, causing it to flutter back and forth. We then  
244 counted the number of spiders that emerged in response to this vibratory stimulus. Colony  
245 foraging aggressiveness was evaluated thrice in 2018, twice in one day and a third time a day  
246 later. In 2019, surviving colonies were assayed 1-3 times more, to evaluate whether between-  
247 group differences in collective behavior were associated across generations, which they were  
248 ( $F_{1,99} = 99.52$ , main effect = 0.96, se  $\pm$  0.10,  $p < 0.0001$ ). The majority of colonies were assayed  
249 in an identical manner to 2018. However, for a small subset of colonies, foraging aggressiveness

250 was measured only once in 2019 because the field season was cut short owing to a medical  
251 emergency.

252

### 253 *Removal & Dissection*

254 In June 2018, when colonies are dormant during the Austral winter, nests were removed from  
255 their substrate and dissected at hotels to count the number of egg cases produced by the colony in  
256 2018 (*egg case #*). Colonies were refrigerated during this process as to keep spiders inactive  
257 prior to and after the dissection process. The perimeter of the nest was then stapled closed and  
258 colonies were re-adhered to their collection points using aluminum wiring to supplement their  
259 supporting structures and staples.

260

### 261 *Statistical Methods*

262 To separate colony aggression into within cluster and among cluster components, we calculated  
263 the mean aggression of colonies within each cluster in 2018 (giving “cluster average  
264 aggression”), and then subtracted this from each colony’s mean aggression score in 2018 (giving  
265 “colony  $\Delta$  aggression”). This approach for separating levels of selection is known as “contextual  
266 analysis” (28, 29). We then entered each of these terms into a linear mixed-effect model with a  
267 Gaussian error distribution, with the proportion increase in size of the colony between 2018 and  
268 2019 as the response variable. For this measure of colony success, colonies that went extinct  
269 have a score of 0, while colonies that doubled in size have a score of 1, scores ranged from 0 to  
270 2.826. The effect of colony  $\Delta$  aggression corresponds to within-cluster selection, while the effect  
271 of cluster average aggression corresponds to among-cluster selection. We added the number of  
272 colonies in the cluster as a fixed effect and interacted this term with both cluster average

273 aggression and colony delta aggression, to determine if either level of selection was density  
274 dependent. All three of these fixed effects were mean-centered and divided by their own standard  
275 deviation, meaning each variable has a mean of 0 and a variance of 1, making the regression  
276 coefficients easier to interpret (30). Cluster ID was entered as a random effect. We tested each  
277 interaction term for significance using likelihood ratio-tests, and if it was not significant at  $\alpha =$   
278 0.05, we removed it and tested the main effect in the same manner.

279 To confirm our findings were robust to the choice of colony performance metric, we re-  
280 fitted this model with the number of egg-cases in the colony as a response variable, an offset of  
281 the log of colony size in 2018 (effectively modelling egg cases per capita) and a Poisson error  
282 distribution. Models were fitted in R 3.5.3 (31) using the package “glmmTMB” (32).

283

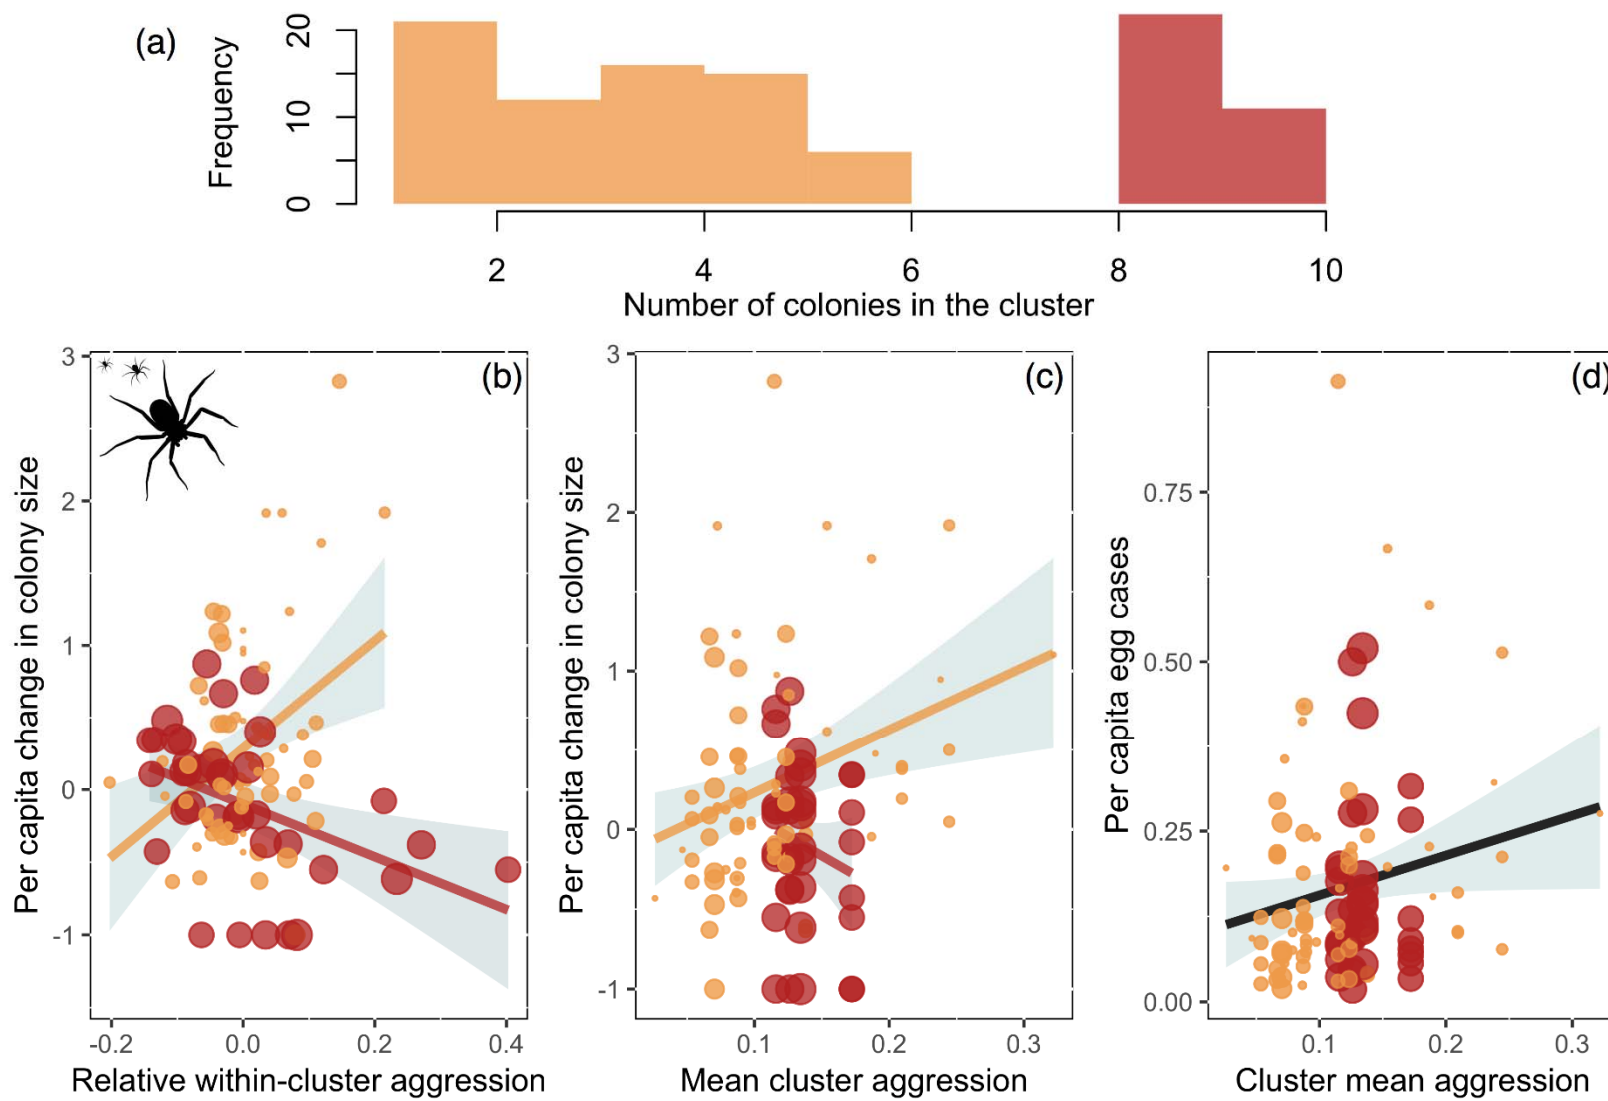

**Figure 1**

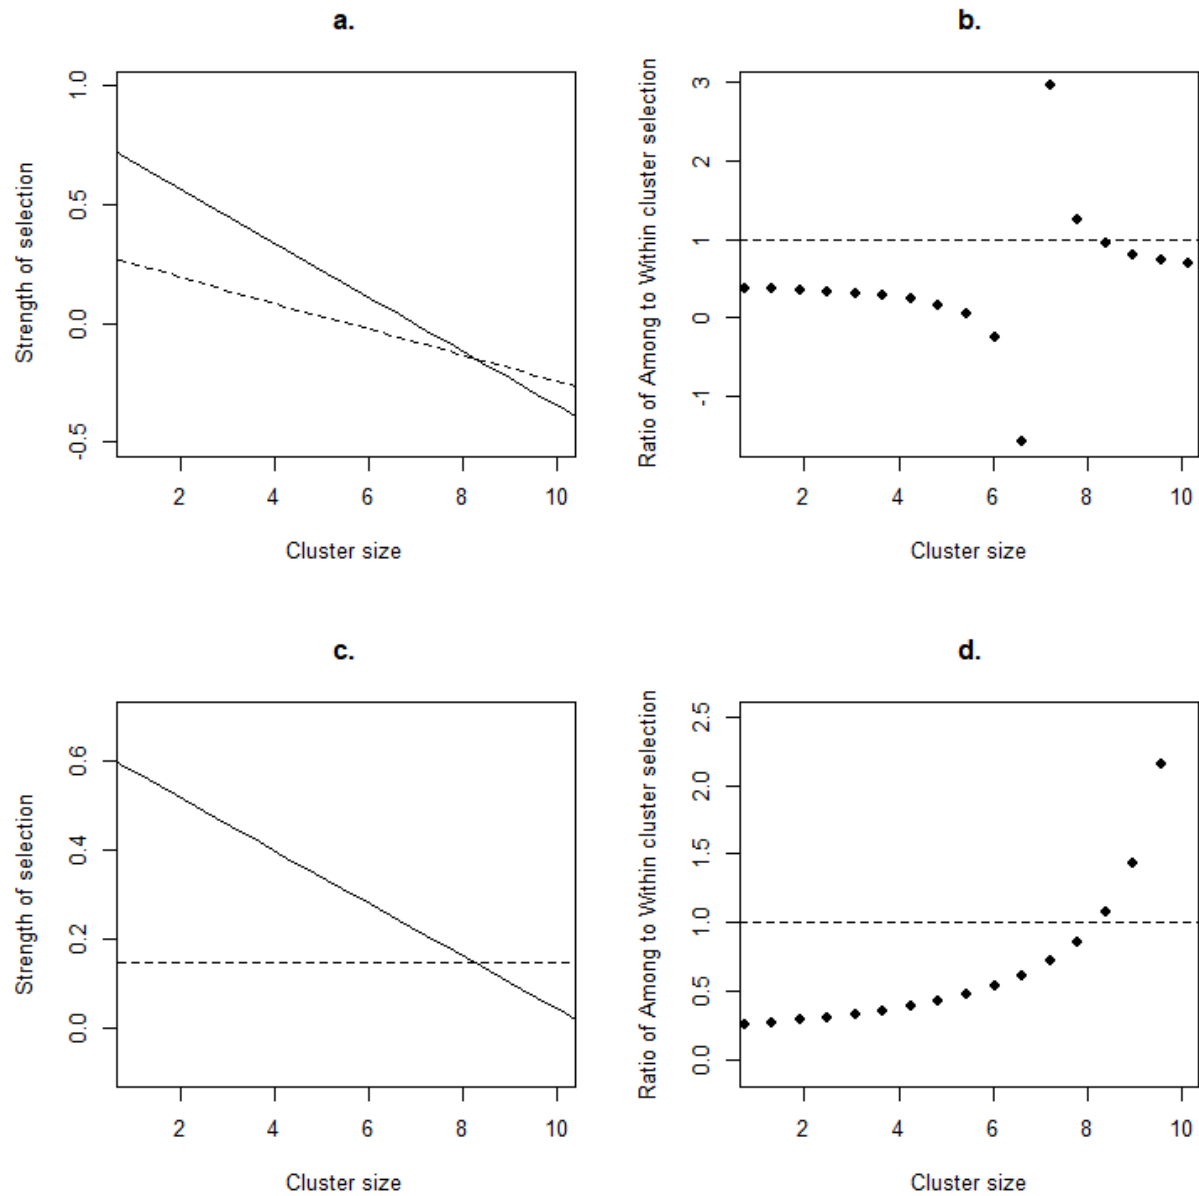

**Figure S1:** Top panels (a & b) depict selection estimates based on change in colony size, and the bottom panels (c & d) depict selection based on egg case production. The left panel (a & c) depicts the strength of within (solid line) and among (dashed line) cluster selection at various cluster sizes. The right panel (b & d) is how the ratio (among/within) changes with cluster size.
